# Supplementary material for: Magnetic copper–iron nanoparticles as simple heterogeneous catalysts for the azide–alkyne click reaction in water
Source: Royal Society of Chemistry journal article supplement (doi:10.1039/c2gc16421c), 2012-01-01

**Supplementary Information to:**

**Copper-Iron oxide nanoparticles as magnetically recoverable catalysts for the azide-alkyne 'click' reaction in water**

Reuben Hudson,<sup>a</sup> Chao-Jun Li<sup>a</sup> and Audrey Moores<sup>\*a</sup>

Figure 1. XPS Analysis of Cu@Fe NPs

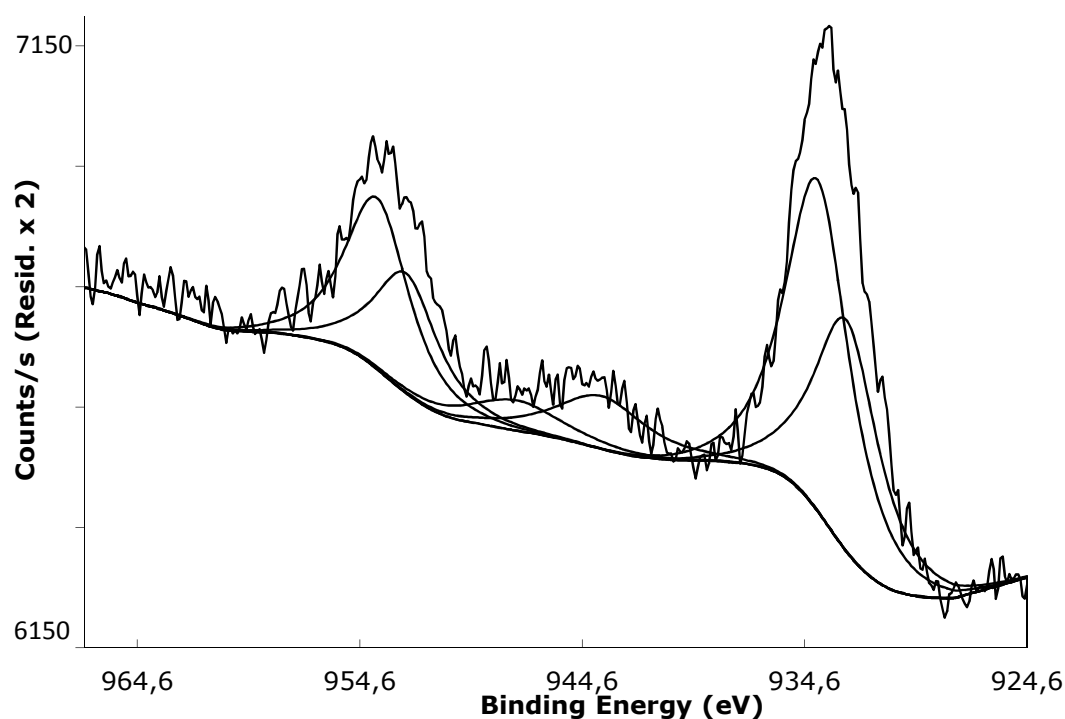

Supplement: c2gc16421c.pdf [file c2gc16421c.pdf]
